# Supplementary material
Source: Springer Nature journal article supplement (https://www.springermedizin.de/resource/supplementary/13053_2013_455_MOESM5_ESM.pdf/9673890)
Supplement: MOESM5 [file 9673890]

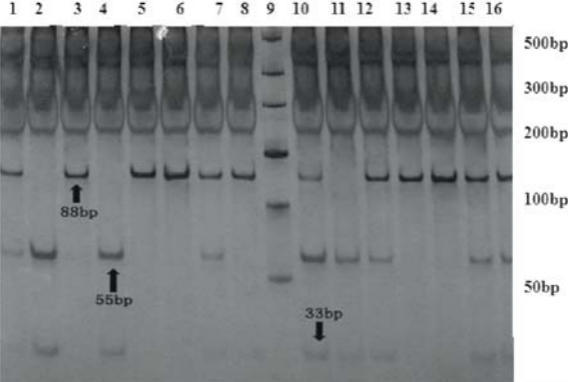

**Lane 2, 4, 11, : Homozygous C/C genotype**

**Lane 3, 5, 6, 8, 13, 14 : Homozygous T/T genotype**

**Lane 9 : 50bp DNA Fragment Marker**

**Lane 1, 7, 10, 12, 15, 16 : Heterozygous C/T genotype**
